# Supplementary material for: PERK activation by SB202190 ameliorates amyloidogenesis via the TFEB-induced autophagy-lysosomal pathway
Source: Aging (Albany NY). 2022 Feb 15;14(3):1233–52. doi: 10.18632/aging.203899 (PMC8876914; doi:10.18632/aging.203899)
Supplement: Supplementary Figures [file aging-14-203899-s001.pdf]

## SUPPLEMENTARY FIGURES

**A**

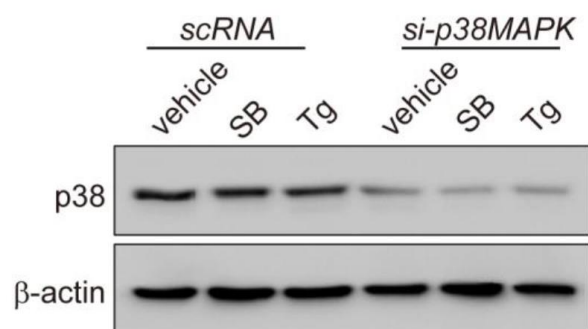

**B**

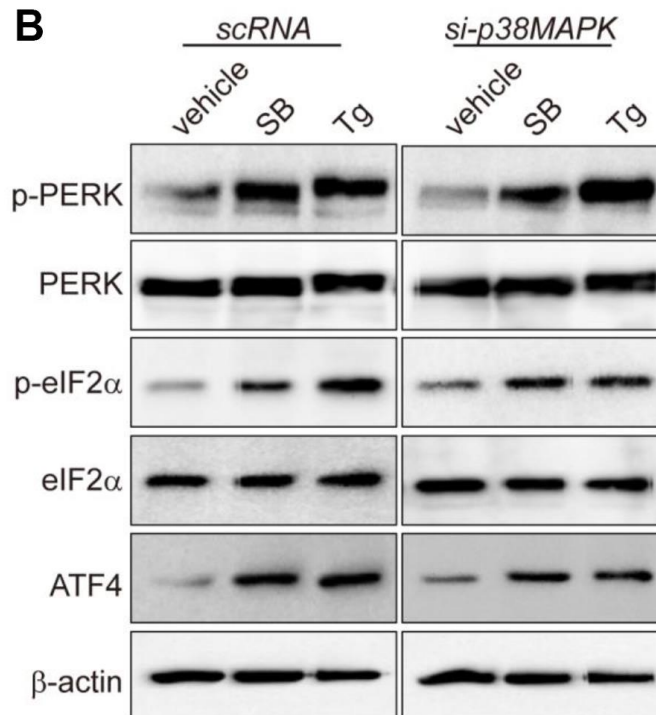

**Supplementary Figure 1. PERK activation with SB202190 is independent of p38 MAPK-related to Figure 1.** (A, B) SH-SY5Y cells were transfected with control siRNA (scRNA) or si-p38 MAPK for 48 h and then treated with 20  $\mu$ M SB202190 for 6 h or 1  $\mu$ M Tg for 30 min. Cell lysates were evaluated for p38 MAPK knockdown by western blot (A) and detected with antibodies against p-PERK, PERK, p-eIF2 $\alpha$ , eIF2 $\alpha$ , and ATF4 by western blotting (B).

**A**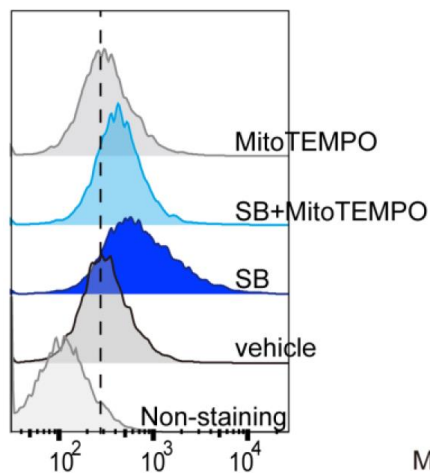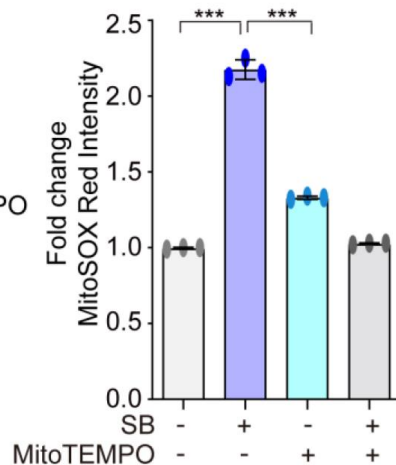**B**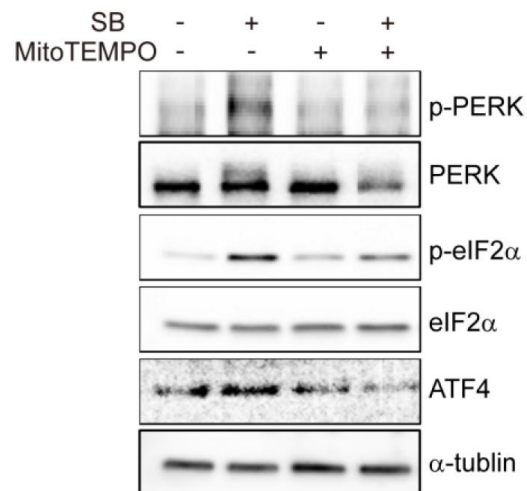

**Supplementary Figure 2. PERK activation with SB202190 is induced by ROS production- related to Figure 2. (A, B)** HEK293 cells were pretreated with MitoTEMPO (100 nM) for 1 h and then treated with 20  $\mu$ M SB202190 for 3 h. **(A)** MitoSOX fluorescence was analyzed by flow cytometry (left), and quantification of fluorescence was normalized (right). Data are mean  $\pm$  SD ( $n=3$ ), \*\*\* $p<0.001$ . **(B)** The activation of PERK was analyzed by western blotting using the indicated antibodies.

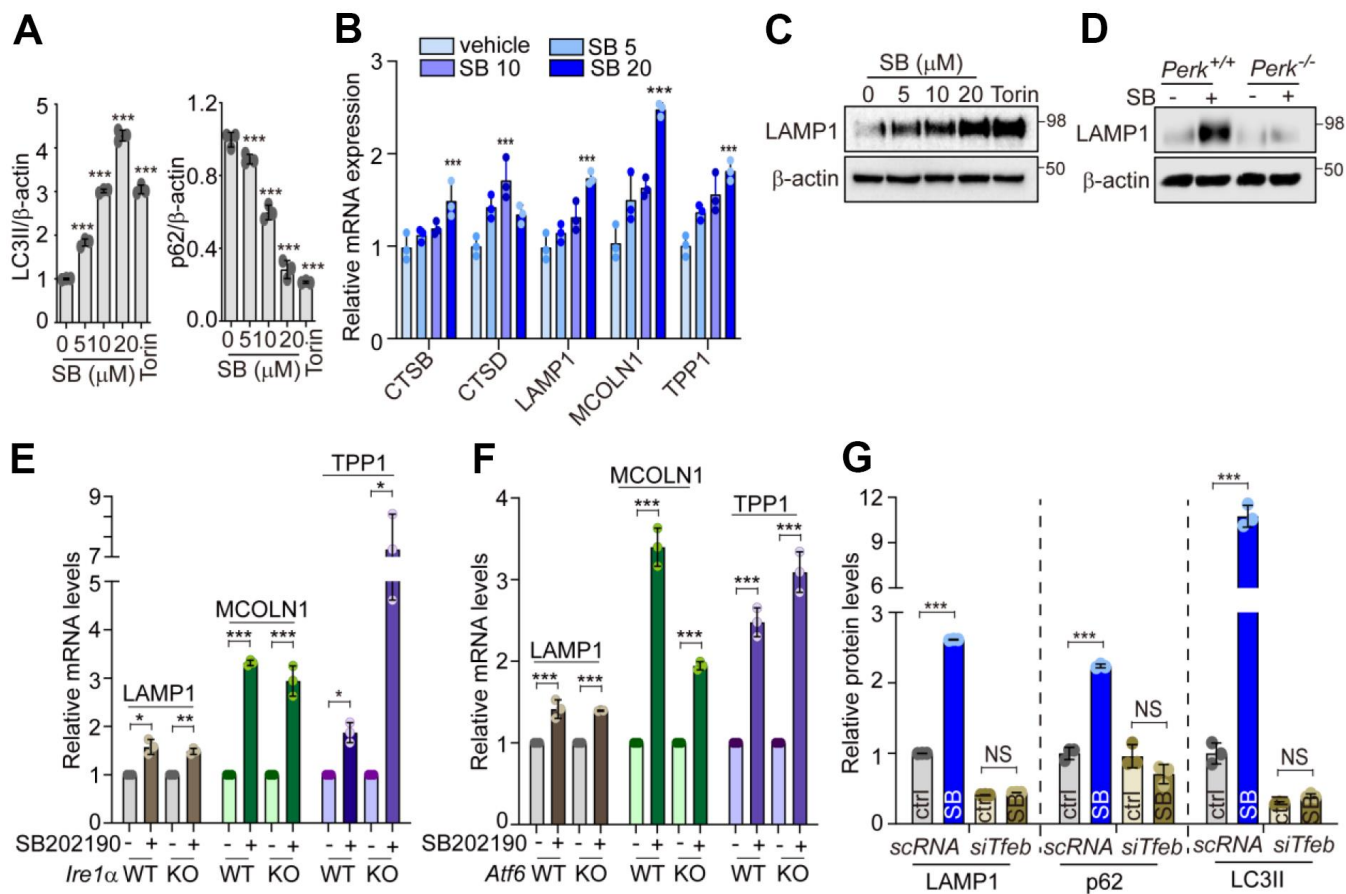

**Supplementary Figure 3. PERK activation by SB202190 facilitates autophagy and lysosome biogenesis via TFEB activation related to Figure 5.** (A) Western blotting shown in Figure 5A was analyzed to quantify the band densities. Data represent mean  $\pm$  SD, \*\*\* $p$ <0.001. (B) SH-SY5Y cells were treated with SB202190 (5, 10, and 20  $\mu$ M) for 6 h, and then lysosomal genes were analyzed by qRT-PCR. Data represent mean  $\pm$  SD; \*\*\* $p$ <0.001. (C) SH-SY5Y cells were treated with SB202190 at the indicated concentrations for 6 h. Torin-1 (2  $\mu$ M) was used as a positive control. The levels of LAMP1 and p62 expression were evaluated by western blotting. (D) *Perk*<sup>+/+</sup> and *Perk*<sup>-/-</sup> MEFs were treated with SB202190 for 6 h, and LAMP1 expression was analyzed by western blotting. (E) Western blotting shown in Figure 5E was analyzed to quantify the band densities. (F, G) Hepatocytes from *Ire1α*<sup>+/+</sup>, *Ire1α*<sup>-/-</sup> (F), *Atf6α*<sup>+/+</sup>, and *Atf6α*<sup>-/-</sup> (G) mice were treated with SB202190 (20  $\mu$ M) for 6 h to assess the levels of LAMP1, MCOLN1, and TPP1 expression by qRT-PCR. Data represent mean  $\pm$  SD; \* $p$ <0.05, \*\* $p$ <0.01, and \*\*\* $p$ <0.001.

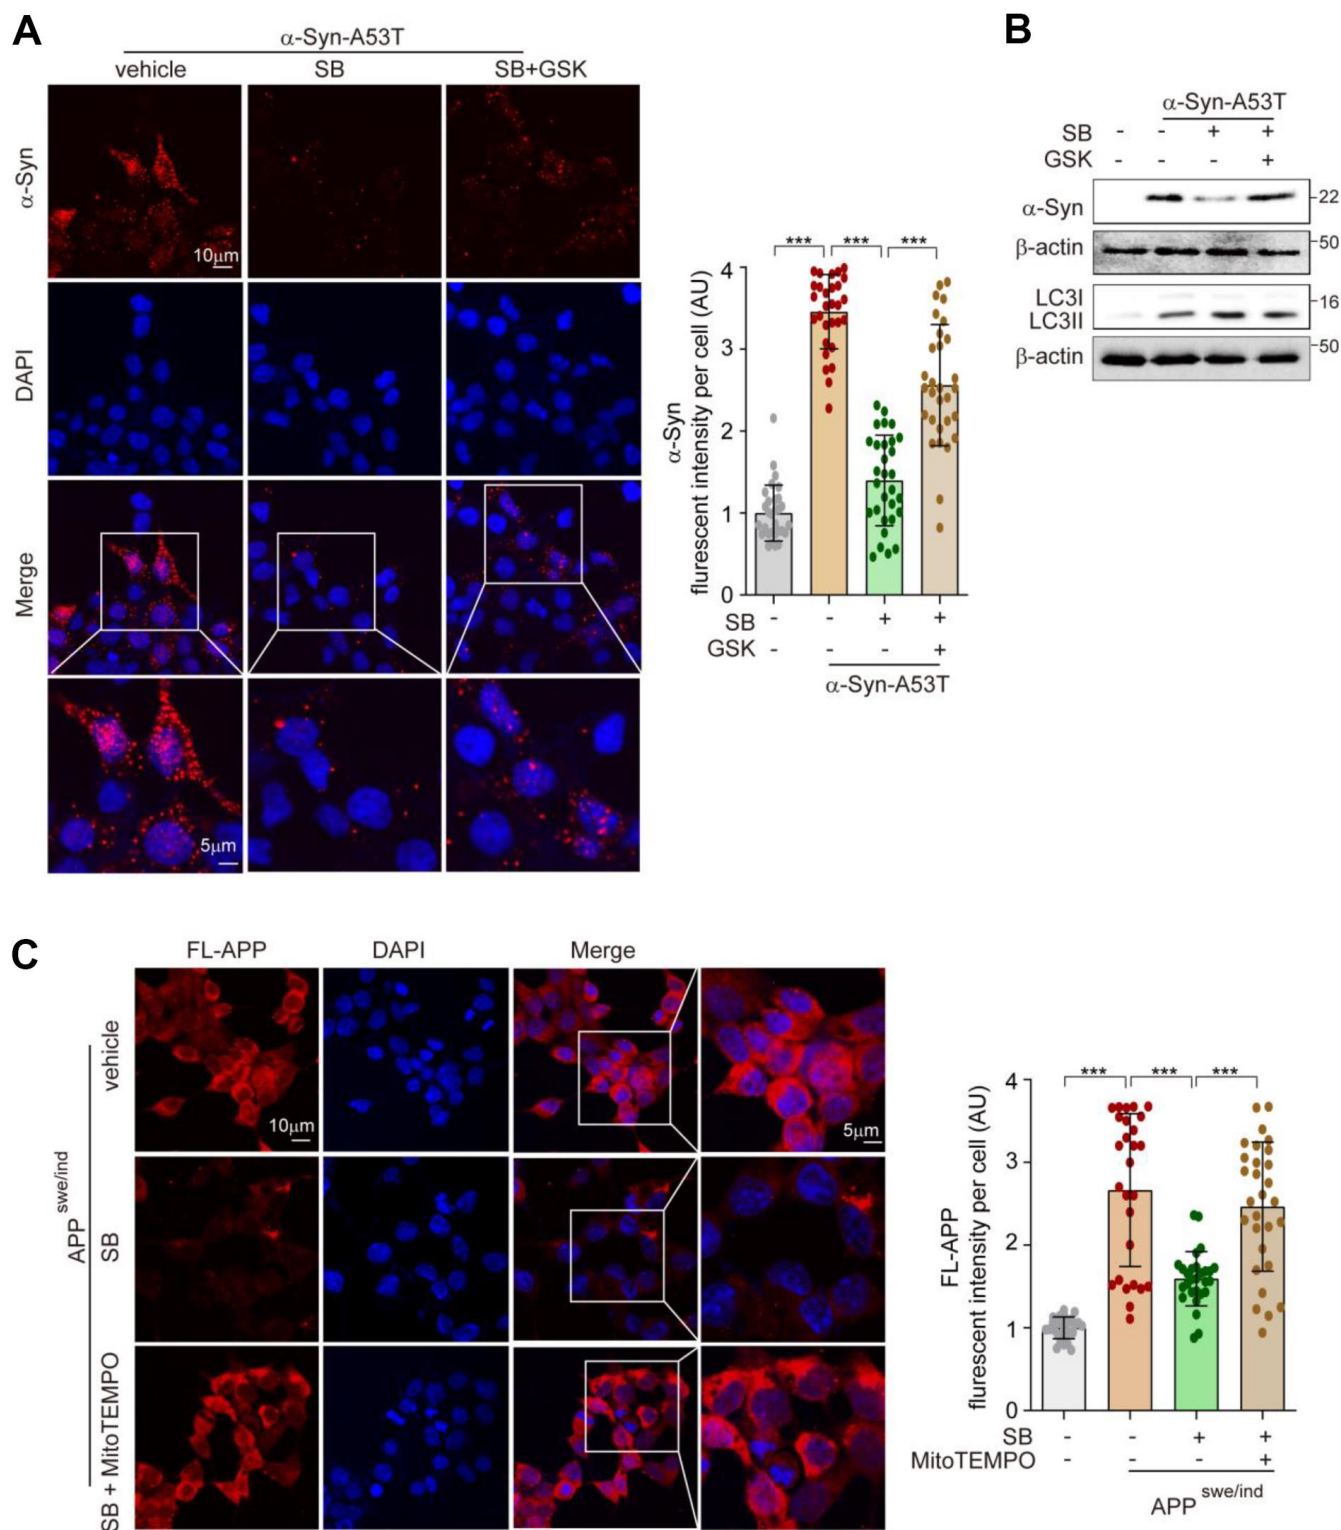

**Supplementary Figure 4. PERK activation by SB202190 reduces the aggregation of APP and  $\alpha$ -syn accumulation through TFEB-ALP activation in SH-SY5Y cells related to Figure 6. (A, B) SH-SY5Y cells were transiently transfected with  $\alpha$ -Syn-A53T for 48 h. Cells were treated with GSK2606414 (1  $\mu$ M) for 1 h before SB202190 (20  $\mu$ M) treatment for 12 h. Representative image of  $\alpha$ -Syn was detected by confocal microscopy (left) and quantification of  $\alpha$ -Syn intensity (right). Data represent mean  $\pm$  SD; \*\*\* $p$ <0.001. (B) The levels of  $\alpha$ -Syn and LC3B-II conversion were analyzed by western blotting. (C) SH-SY5Y cells were transfected with pCAX-APP-Swe/Ind (APP<sup>swe/ind</sup>) for 48 h. Cells were subsequently pretreated with MitoTEMPO (100 nM) for 1 h and then treated with SB202190 (20  $\mu$ M) for 12 h. Representative image of FL-APP was analyzed by confocal microscopy (left) and quantification of FL-APP intensity (right). Data represent mean  $\pm$  SD; \*\*\* $p$ <0.001.**
